# Supplementary material
Source: ML conference proceedings conference paper supplement (https://www.ecva.net/papers/eccv_2024/papers_ECCV/html/5476_ECCV_2024_paper.php)
Supplement: Supplementary file 1 [file 05476-supp.pdf]

# Neural Graphics Texture Compression

## Supporting Random Access

### *Supplementary Material*

Farzad Farhadzadeh<sup>1</sup>, Qiqi Hou<sup>1</sup>, Hoang Le<sup>1</sup>, Amir Said<sup>1</sup>, Fatih Porikli<sup>1</sup>, Randall Rauwendaal<sup>1</sup>, and Alex Bourd<sup>1</sup>

Qualcomm AI research, San Diego CA 92121, USA

{ffarhadz,qhou,hoanle,asaid,abourd,rrauwend,fporikli}@qti.qualcomm.com

## A Network architecture

### A.1 Global transformation

Figure 1 shows the details of global transformation architecture. As mentioned in Section 4.1 the global transformer in our setup has the same architecture as [1] except that we removed the attention layers and reduced the number of downsampling blocks (Conv k5s2, representing a convolution with the kernel size 5 and the stride 2) from 4 blocks to 3 blocks. We also added  $\frac{1}{2} \tanh$  to bound the output of encoder between  $[-0.5, 0.5]$ .

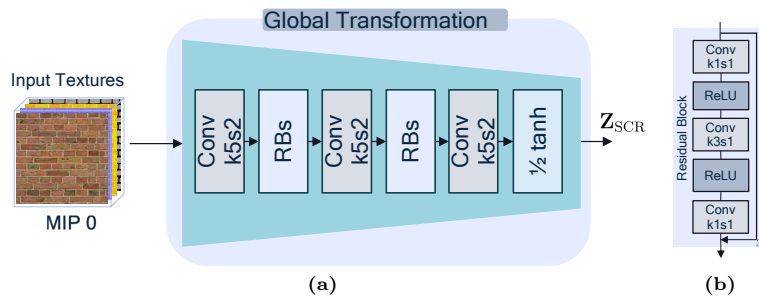

**Fig. 1:** Overview of Global Transformation architecture. Conv kxsy indicates a convolution with the kernel size x and the stride y.

### A.2 Texture synthesizer

Figure 2 shows the architecture of texture synthesizer in our compression setup.

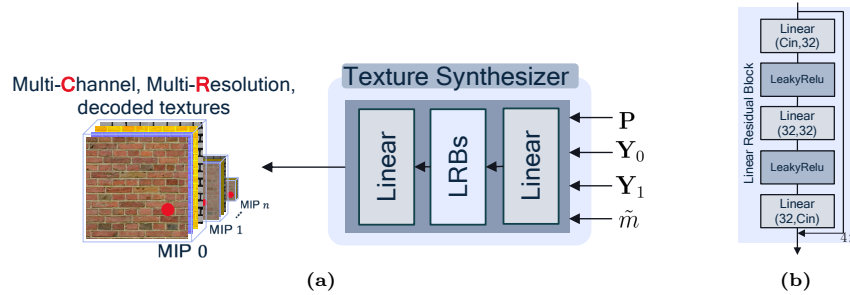

Fig. 2: Overview of decoder architecture. We use convention  $(c_{in}, c_{out})$  for linear layers.

## B More results

### B.1 Channel wise performance

Table 1 and Table 2 present the performance results in terms of PSNR (dB) and BPPC. These results are linked to the diffuse and the normal maps, respectively, of all textures utilized in our evaluation. We compare our method, referred to as CNTC, with NTC [2]. As demonstrated, in most cases, our method outperforms NTC.

### B.2 Performance through all mip levels

The performance of a compression technique can vary based on the frequency spectrum of the texture, resulting in different outcomes across mip levels [2]. In Table 3 and Table 4, we demonstrate the PSNR (dB) for the complete range of mip levels ( $m = 0, \dots, 9$ ) associated with texture sets ‘Ceramic roof 01’<sup>1</sup> and ‘Paving stones 131’<sup>2</sup>, respectively. The tables present the results of all the channels in the texture sets separately, with the second column showing the reconstructed mip level. These results are evaluated based on our method with the lowest BPPC=0.18 referred to as CNTC 16.

## References

1. He, D., Yang, Z., Peng, W., Ma, R., Qin, H., Wang, Y.: Elic: Efficient learned image compression with unevenly grouped space-channel contextual adaptive coding. 2022 IEEE/CVF Conference on Computer Vision and Pattern Recognition (CVPR) (Jun 2022) 1
2. Vaidyanathan, K., Salvi, M., Wronski, B., Akenine-Möller, T., Ebelin, P., Lefohn, A.: Random-Access Neural Compression of Material Textures. In: Proceedings of SIGGRAPH (2023) 2, 3, 4

<sup>1</sup> retrieved from <https://polyhaven.com/>

<sup>2</sup> retrieved from <https://ambientcg.com/>

**Table 1:** PSNR scores of our re-implementation of [2] versus ours (CNTC) for the diffuse, numbers are indicating: PSNR [↑] (BPPC [↓]), where PSNR is calculated for MIP 0 of the diffuse map. The texture sets at the first three rows are retrieved from PolyHaven (<https://polyhaven.com/>) and the rest from ambientCG (<https://ambientcg.com/>).

| Texture set                                                                         | NTC 0.2                                                                             | CNTC 16                                                                             | NTC 0.5                                                                             | CNTC 32                                                                             | NTC 1.0                                                                              | CNTC 64                                                                               | Reference                                                                             |
|-------------------------------------------------------------------------------------|-------------------------------------------------------------------------------------|-------------------------------------------------------------------------------------|-------------------------------------------------------------------------------------|-------------------------------------------------------------------------------------|--------------------------------------------------------------------------------------|---------------------------------------------------------------------------------------|---------------------------------------------------------------------------------------|
| 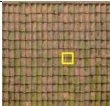   |    |    |    |    |    |    |    |
| ceramic roof 01                                                                     | 35.81 (0.17)                                                                        | <b>36.82</b> (0.18)                                                                 | 38.78 (0.38)                                                                        | <b>40.53</b> (0.39)                                                                 | 41.29 (0.76)                                                                         | <b>44.04</b> (0.73)                                                                   | Ground Truth                                                                          |
|    |    |    |    |    |    |    |    |
| denim fabric                                                                        | 26.49 (0.17)                                                                        | <b>27.23</b> (0.18)                                                                 | 34.38 (0.38)                                                                        | <b>35.30</b> (0.39)                                                                 | 35.14 (0.76)                                                                         | <b>38.94</b> (0.73)                                                                   | Ground Truth                                                                          |
|   |   |   |   |   |   |   |   |
| painted concrete                                                                    | 28.62 (0.17)                                                                        | <b>29.69</b> (0.18)                                                                 | 31.55 (0.38)                                                                        | <b>32.54</b> (0.39)                                                                 | 36.48 (0.76)                                                                         | <b>37.34</b> (0.73)                                                                   | Ground Truth                                                                          |
|  |  |  |  |  |  |  |  |
| metal plates 013                                                                    | 37.77 (0.17)                                                                        | <b>37.98</b> (0.18)                                                                 | 39.71 (0.38)                                                                        | <b>40.85</b> (0.39)                                                                 | 42.63 (0.76)                                                                         | <b>43.23</b> (0.73)                                                                   | Ground Truth                                                                          |
|  |  |  |  |  |  |  |  |
| paving stones 131                                                                   | 28.40 (0.17)                                                                        | <b>28.54</b> (0.18)                                                                 | 30.63 (0.38)                                                                        | <b>31.28</b> (0.39)                                                                 | <b>35.28</b> (0.76)                                                                  | 34.85 (0.73)                                                                          | Ground Truth                                                                          |
|  |  |  |  |  |  |  |  |
| terrazzo 018                                                                        | 33.89 (0.17)                                                                        | <b>38.43</b> (0.20)                                                                 | 38.07 (0.38)                                                                        | <b>42.54</b> (0.44)                                                                 | 41.77 (0.76)                                                                         | <b>46.52</b> (0.82)                                                                   | Ground Truth                                                                          |
|  |  |  |  |  |  |  |  |
| wood 063                                                                            | 27.28 (0.17)                                                                        | <b>27.77</b> (0.18)                                                                 | 30.37 (0.38)                                                                        | <b>31.98</b> (0.39)                                                                 | 35.08 (0.76)                                                                         | <b>37.23</b> (0.73)                                                                   | Ground Truth                                                                          |

**Table 2:** PSNR scores of our re-implementation of [2] versus ours (CNTC) for the normal map, numbers are presenting: PSNR [↑] (BPPC [↓]), where PSNR is calculated for MIP 0 of the normal map. The texture sets at the first three rows are retrieved from PolyHaven (<https://polyhaven.com/>) and the rest from ambientCG (<https://ambientcg.com/>).

| Texture set                                                                         | NTC 0.2                                                                             | CNTC 16                                                                             | NTC 0.5                                                                             | CNTC 32                                                                             | NTC 1.0                                                                              | CNTC 64                                                                               | Reference                                                                             |
|-------------------------------------------------------------------------------------|-------------------------------------------------------------------------------------|-------------------------------------------------------------------------------------|-------------------------------------------------------------------------------------|-------------------------------------------------------------------------------------|--------------------------------------------------------------------------------------|---------------------------------------------------------------------------------------|---------------------------------------------------------------------------------------|
| 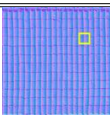   |    |    |    |    |    |    |    |
| ceramic roof 01                                                                     | 33.64 (0.17)                                                                        | <b>35.15</b> (0.18)                                                                 | 36.242 (0.38)                                                                       | <b>39.85</b> (0.39)                                                                 | 39.32 (0.76)                                                                         | <b>42.66</b> (0.73)                                                                   | Ground Truth                                                                          |
|    |    |    |    |    |    |    |    |
| denim fabric                                                                        | <b>34.51</b> (0.17)                                                                 | 34.23 (0.18)                                                                        | 35.20 (0.38)                                                                        | <b>36.53</b> (0.39)                                                                 | 39.49 (0.76)                                                                         | <b>39.51</b> (0.73)                                                                   | Ground Truth                                                                          |
|   |   |   |   |   |   |   |   |
| painted concrete                                                                    | 34.58 (0.17)                                                                        | <b>35.43</b> (0.18)                                                                 | 34.81 (0.38)                                                                        | <b>36.56</b> (0.39)                                                                 | <b>38.77</b> (0.76)                                                                  | 37.64 (0.73)                                                                          | Ground Truth                                                                          |
|  |  |  |  |  |  |  |  |
| metal plates 013                                                                    | 36.68 (0.17)                                                                        | <b>37.88</b> (0.18)                                                                 | 38.78 (0.38)                                                                        | <b>41.07</b> (0.39)                                                                 | 41.29 (0.76)                                                                         | <b>42.19</b> (0.73)                                                                   | Ground Truth                                                                          |
|  |  |  |  |  |  |  |  |
| paving stones 131                                                                   | 28.52 (0.17)                                                                        | <b>28.98</b> (0.18)                                                                 | 30.63 (0.38)                                                                        | <b>32.10</b> (0.39)                                                                 | <b>34.86</b> (0.76)                                                                  | 34.81 (0.73)                                                                          | Ground Truth                                                                          |
|  |  |  |  |  |  |  |  |
| terrazzo 018                                                                        | <b>48.57</b> (0.18)                                                                 | 48.29 (0.20)                                                                        | 49.50 (0.38)                                                                        | <b>52.44</b> (0.44)                                                                 | 52.00 (0.76)                                                                         | <b>52.42</b> (0.82)                                                                   | Ground Truth                                                                          |
|  |  |  |  |  |  |  |  |
| wood 063                                                                            | 26.40 (0.17)                                                                        | <b>27.83</b> (0.18)                                                                 | 29.63 (0.38)                                                                        | <b>31.87</b> (0.39)                                                                 | 33.07 (0.76)                                                                         | <b>35.88</b> (0.73)                                                                   | Ground Truth                                                                          |

**Table 3:** “Ceramic roof 01” reconstructed mips using our method with lowest BPPC corresponding to CNTC 16.

|                | Reconstruction mips 0, . . . , 5                                                    | mip level | resolution  | PSNR (dB) |
|----------------|-------------------------------------------------------------------------------------|-----------|-------------|-----------|
| diffuse        | 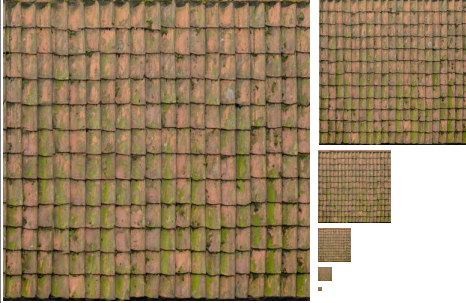   | 0         | 2048 × 2048 | 36.82     |
|                |                                                                                     | 1         | 1024 × 1024 | 39.82     |
|                |                                                                                     | 2         | 512 × 512   | 39.75     |
|                |                                                                                     | 3         | 256 × 256   | 35.40     |
|                |                                                                                     | 4         | 128 × 128   | 34.98     |
|                |                                                                                     | 5         | 64 × 64     | 36.47     |
|                |                                                                                     | 6         | 32 × 32     | 39.06     |
|                |                                                                                     | 7         | 16 × 16     | 43.45     |
|                |                                                                                     | 8         | 8 × 8       | 45.53     |
|                |                                                                                     | 9         | 4 × 4       | 42.46     |
| normal         |   | 0         | 2048 × 2048 | 35.15     |
|                |                                                                                     | 1         | 1024 × 1024 | 39.08     |
|                |                                                                                     | 2         | 512 × 512   | 39.47     |
|                |                                                                                     | 3         | 256 × 256   | 36.18     |
|                |                                                                                     | 4         | 128 × 128   | 34.07     |
|                |                                                                                     | 5         | 64 × 64     | 36.18     |
|                |                                                                                     | 6         | 32 × 32     | 40.16     |
|                |                                                                                     | 7         | 16 × 16     | 42.93     |
|                |                                                                                     | 8         | 8 × 8       | 42.78     |
|                |                                                                                     | 9         | 4 × 4       | 39.64     |
| displacement   |  | 0         | 2048 × 2048 | 41.97     |
|                |                                                                                     | 1         | 1024 × 1024 | 42.82     |
|                |                                                                                     | 2         | 512 × 512   | 42.53     |
|                |                                                                                     | 3         | 256 × 256   | 39.57     |
|                |                                                                                     | 4         | 128 × 128   | 34.90     |
|                |                                                                                     | 5         | 64 × 64     | 35.35     |
|                |                                                                                     | 6         | 32 × 32     | 37.40     |
|                |                                                                                     | 7         | 16 × 16     | 41.16     |
|                |                                                                                     | 8         | 8 × 8       | 41.38     |
|                |                                                                                     | 9         | 4 × 4       | 36.72     |
| ao & roughness |  | 0         | 2048 × 2048 | 37.31     |
|                |                                                                                     | 1         | 1024 × 1024 | 40.72     |
|                |                                                                                     | 2         | 512 × 512   | 40.99     |
|                |                                                                                     | 3         | 256 × 256   | 37.51     |
|                |                                                                                     | 4         | 128 × 128   | 36.18     |
|                |                                                                                     | 5         | 64 × 64     | 37.89     |
|                |                                                                                     | 6         | 32 × 32     | 40.74     |
|                |                                                                                     | 7         | 16 × 16     | 45.61     |
|                |                                                                                     | 8         | 16 × 16     | 46.24     |
|                |                                                                                     | 9         | 4 × 4       | 45.12     |

**Table 4:** “Paving stones 131” reconstructed mips using our method (CNTC 16).

|                   | Reconstruction mips 0, . . . , 5                                                    | mip level | resolution  | PSNR (dB) |
|-------------------|-------------------------------------------------------------------------------------|-----------|-------------|-----------|
| diffuse           |    | 0         | 2048 × 2048 | 28.54     |
|                   |                                                                                     | 1         | 1024 × 1024 | 34.62     |
|                   |                                                                                     | 2         | 512 × 512   | 36.83     |
|                   |                                                                                     | 3         | 256 × 256   | 33.54     |
|                   |                                                                                     | 4         | 128 × 128   | 32.19     |
|                   |                                                                                     | 5         | 64 × 64     | 32.97     |
|                   |                                                                                     | 6         | 32 × 32     | 36.17     |
|                   |                                                                                     | 7         | 16 × 16     | 41.20     |
|                   |                                                                                     | 8         | 8 × 8       | 47.92     |
|                   |                                                                                     | 9         | 4 × 4       | 51.47     |
| normal            |    | 0         | 2048 × 2048 | 28.98     |
|                   |                                                                                     | 1         | 1024 × 1024 | 35.47     |
|                   |                                                                                     | 2         | 512 × 512   | 39.09     |
|                   |                                                                                     | 3         | 256 × 256   | 37.19     |
|                   |                                                                                     | 4         | 128 × 128   | 37.72     |
|                   |                                                                                     | 5         | 64 × 64     | 38.97     |
|                   |                                                                                     | 6         | 32 × 32     | 41.80     |
|                   |                                                                                     | 7         | 16 × 16     | 46.00     |
|                   |                                                                                     | 8         | 8 × 8       | 51.25     |
|                   |                                                                                     | 9         | 4 × 4       | 55.40     |
| displacement      |   | 0         | 2048 × 2048 | 38.19     |
|                   |                                                                                     | 1         | 1024 × 1024 | 39.88     |
|                   |                                                                                     | 2         | 512 × 512   | 40.17     |
|                   |                                                                                     | 3         | 256 × 256   | 36.60     |
|                   |                                                                                     | 4         | 128 × 128   | 32.94     |
|                   |                                                                                     | 5         | 64 × 64     | 32.50     |
|                   |                                                                                     | 6         | 32 × 32     | 33.80     |
|                   |                                                                                     | 7         | 16 × 16     | 37.35     |
|                   |                                                                                     | 8         | 8 × 8       | 43.68     |
|                   |                                                                                     | 9         | 4 × 4       | 43.94     |
| ambient occlusion |  | 0         | 2048 × 2048 | 26.68     |
|                   |                                                                                     | 1         | 1024 × 1024 | 34.44     |
|                   |                                                                                     | 2         | 512 × 512   | 37.20     |
|                   |                                                                                     | 3         | 256 × 256   | 35.54     |
|                   |                                                                                     | 4         | 128 × 128   | 33.36     |
|                   |                                                                                     | 5         | 64 × 64     | 33.60     |
|                   |                                                                                     | 6         | 32 × 32     | 35.83     |
|                   |                                                                                     | 7         | 16 × 16     | 40.56     |
|                   |                                                                                     | 8         | 8 × 8       | 46.18     |
|                   |                                                                                     | 9         | 4 × 4       | 51.58     |
| roughness         |  | 0         | 2048 × 2048 | 30.64     |
|                   |                                                                                     | 1         | 1024 × 1024 | 36.47     |
|                   |                                                                                     | 2         | 512 × 512   | 39.66     |
|                   |                                                                                     | 3         | 256 × 256   | 37.69     |
|                   |                                                                                     | 4         | 128 × 128   | 36.46     |
|                   |                                                                                     | 5         | 64 × 64     | 36.93     |
|                   |                                                                                     | 6         | 32 × 32     | 38.86     |
|                   |                                                                                     | 7         | 16 × 16     | 40.91     |
|                   |                                                                                     | 8         | 8 × 8       | 45.69     |
|                   |                                                                                     | 9         | 4 × 4       | 51.19     |
